# Supplementary material for: Variability of surface and underwater nocturnal spectral irradiance with the presence of clouds in urban and peri-urban wetlands
Source: PubMed Central journal article supplement (PMC5695598; doi:10.1371/journal.pone.0186808), 2017-11-08

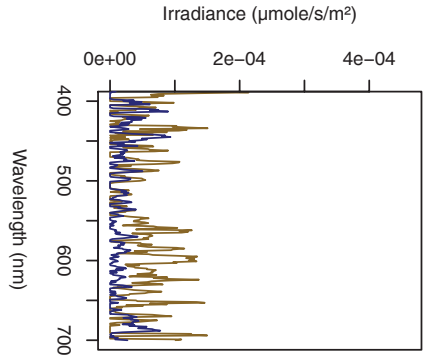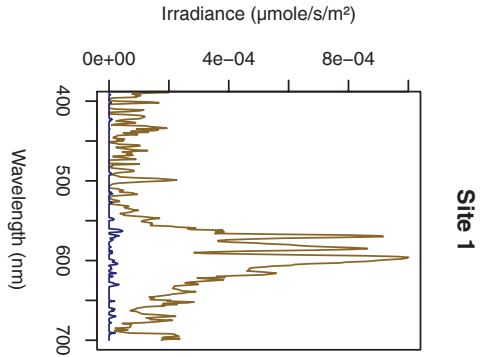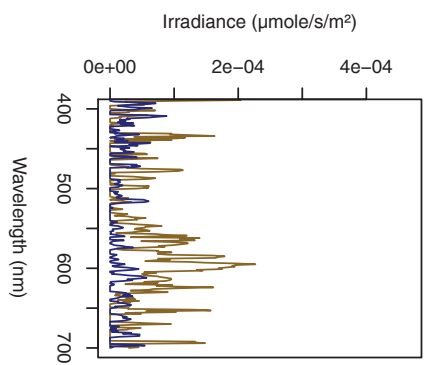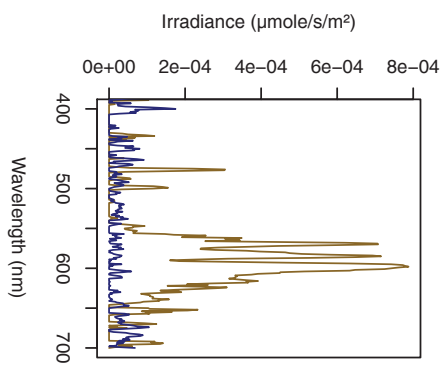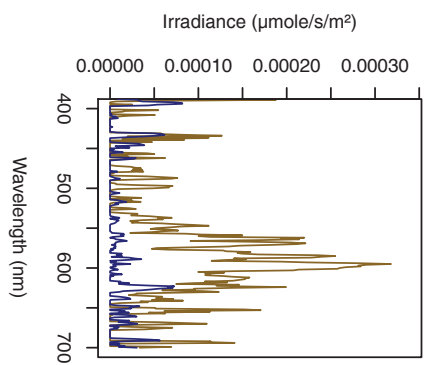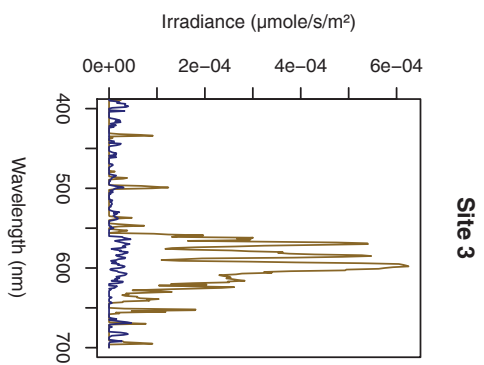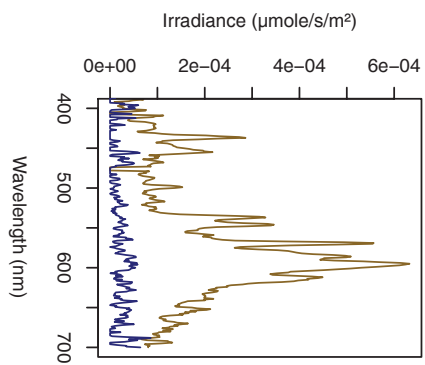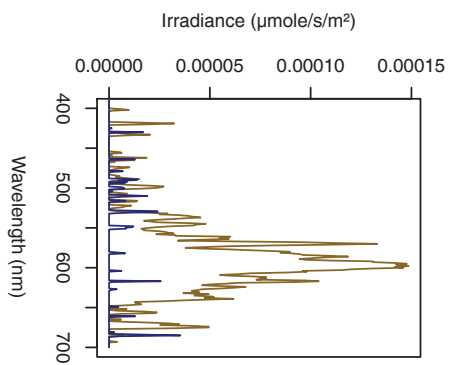

**Site 12**

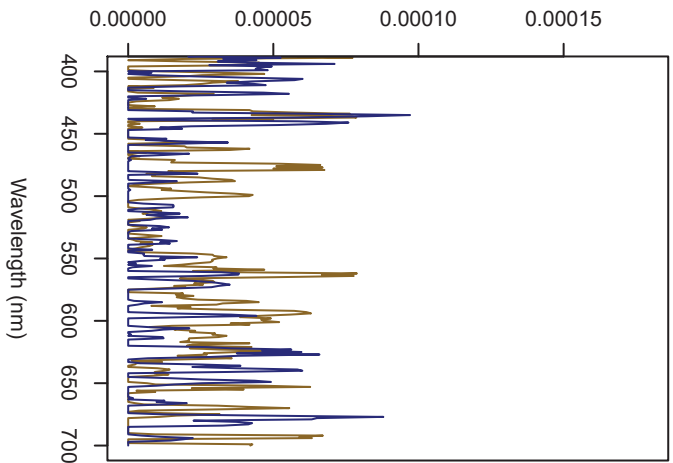

**Site 13**

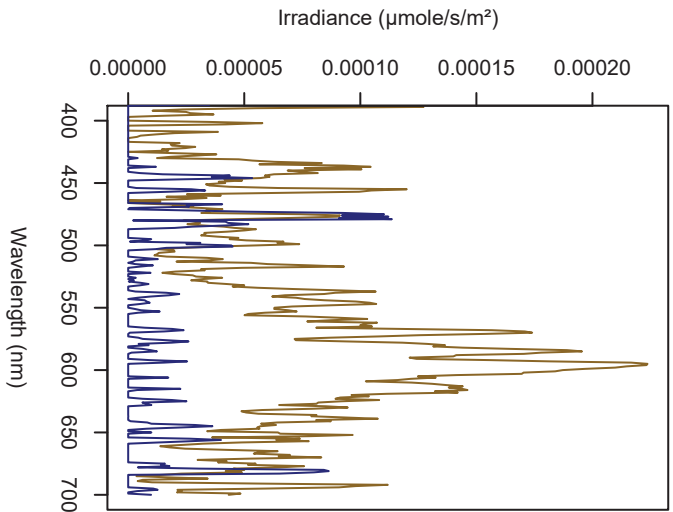

**Site 14**

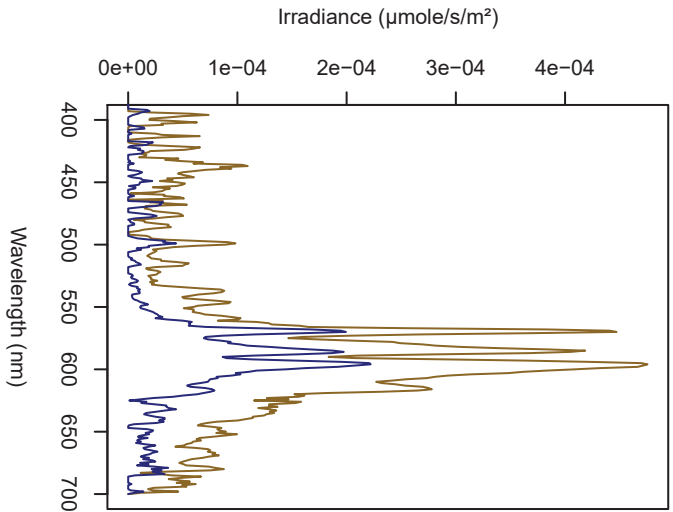

**Site 16**

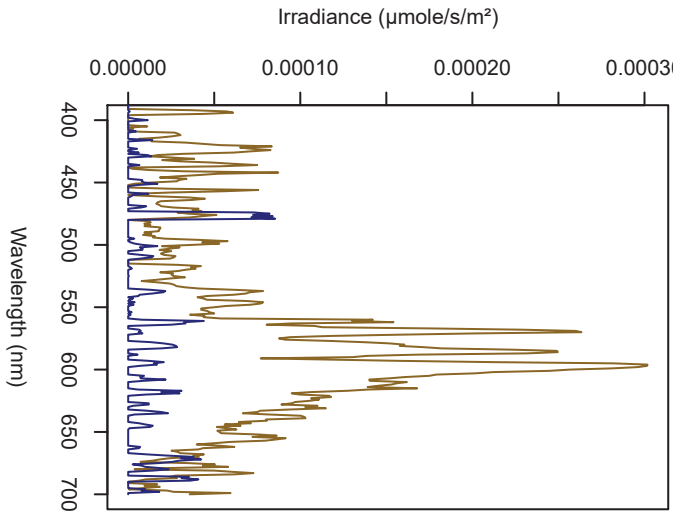

**Site 17**

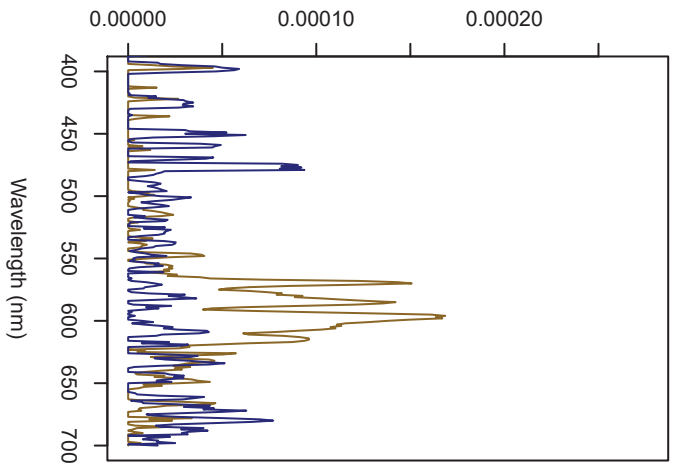

**Site 18**

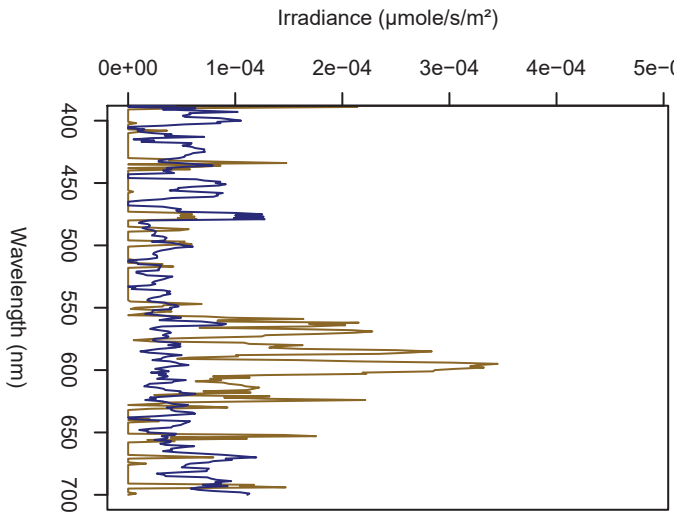

**Site 19**

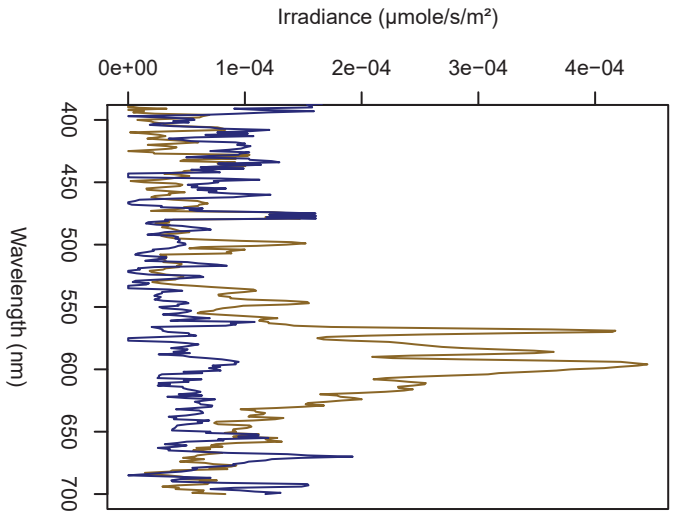

**Site 21**

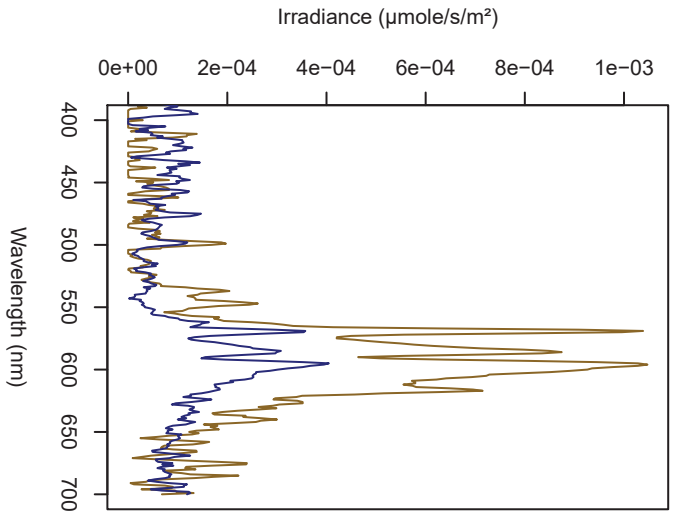

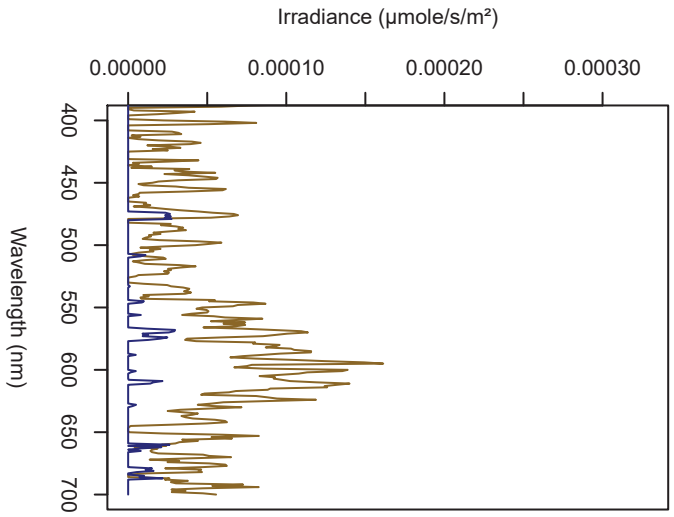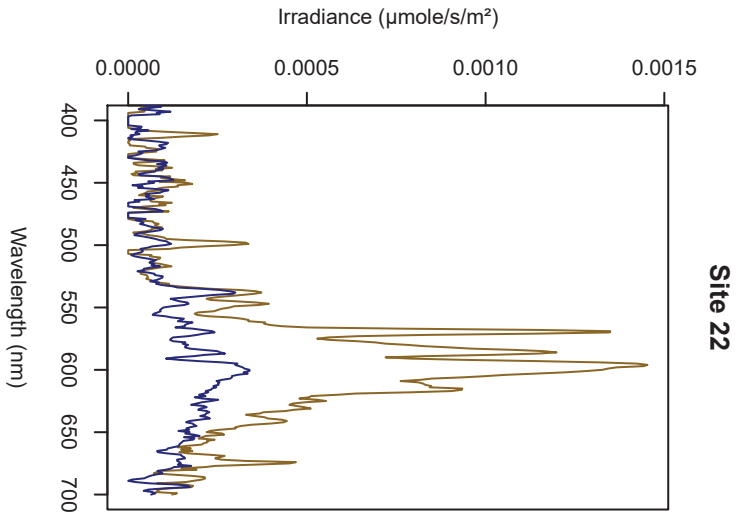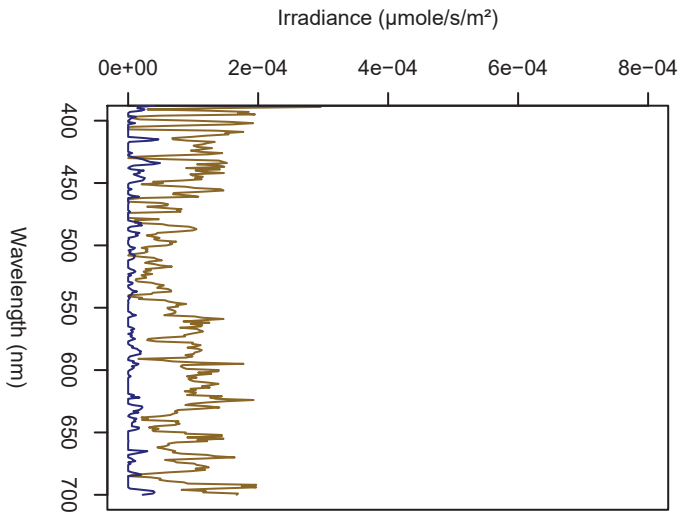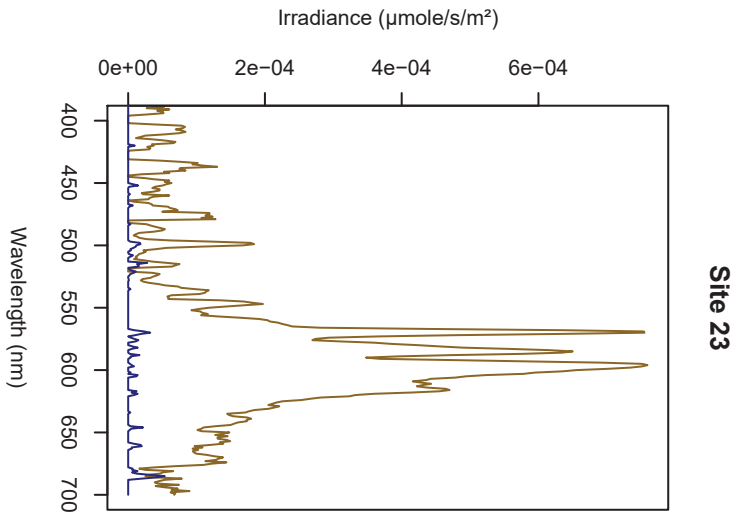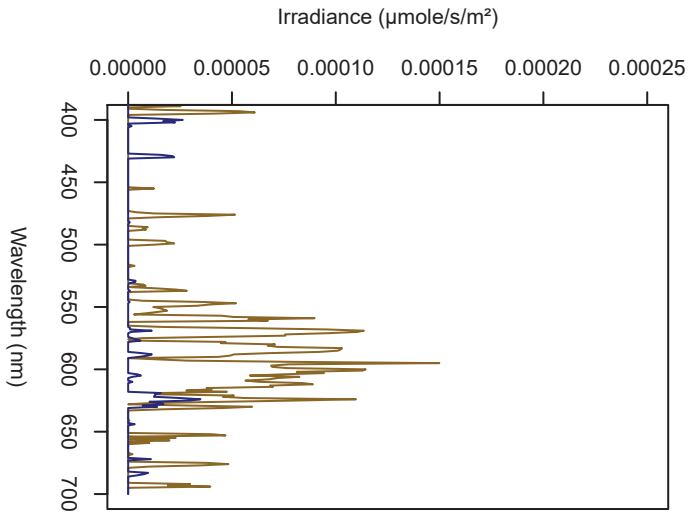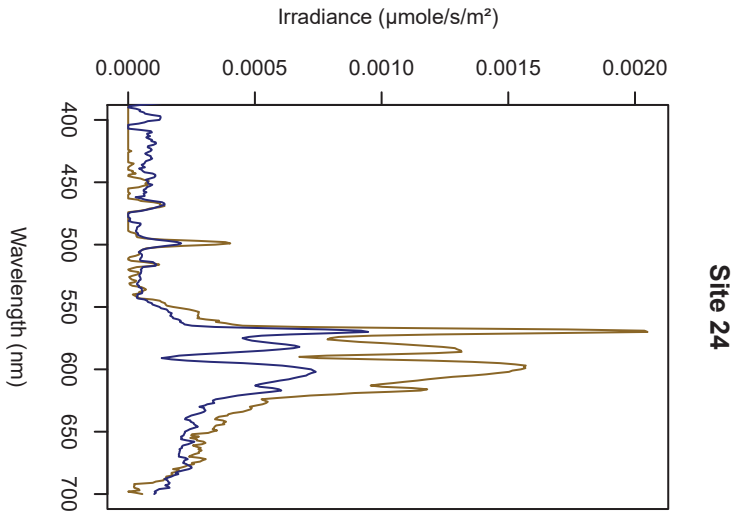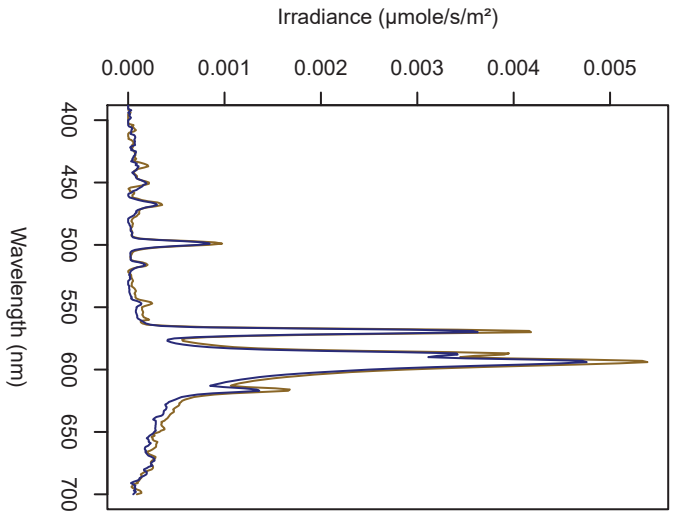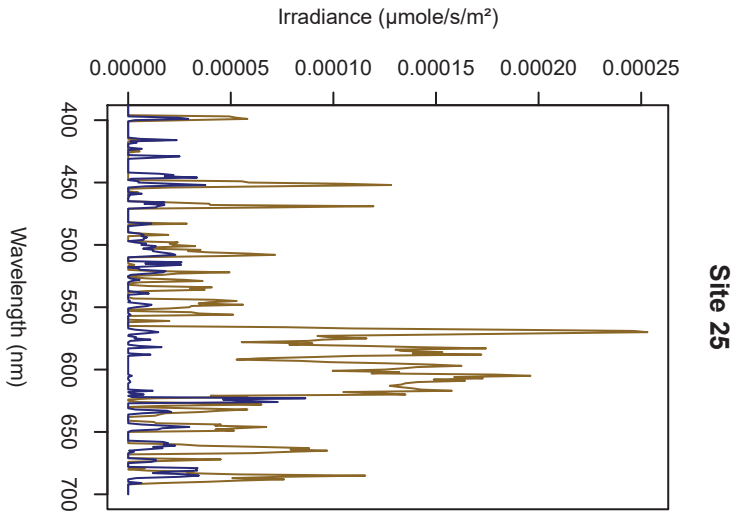

Site 31

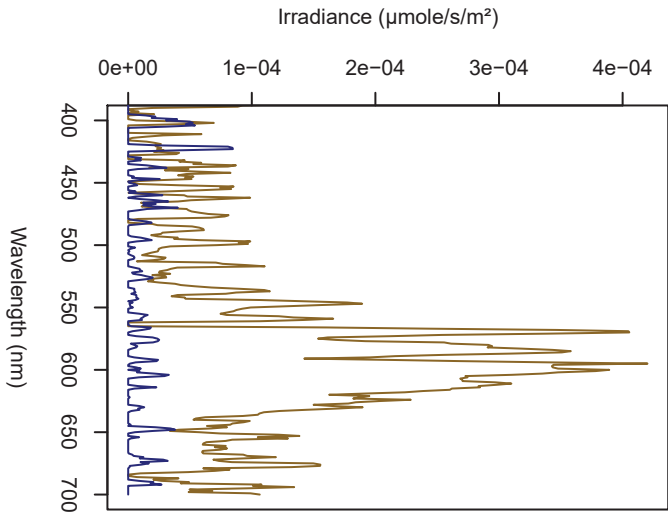

Site 32

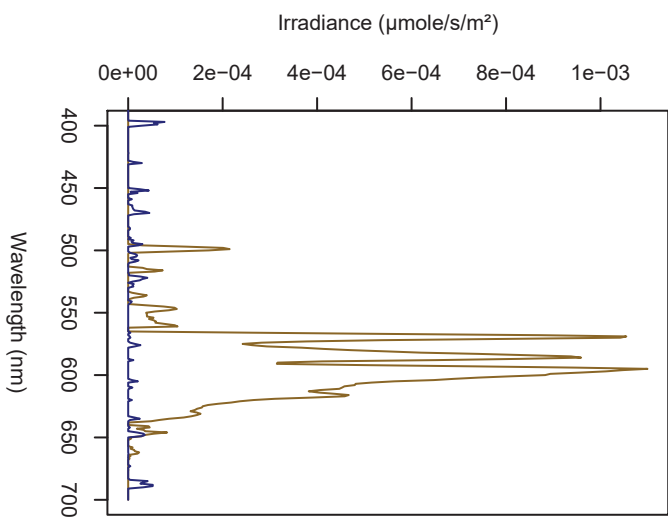

Site 33

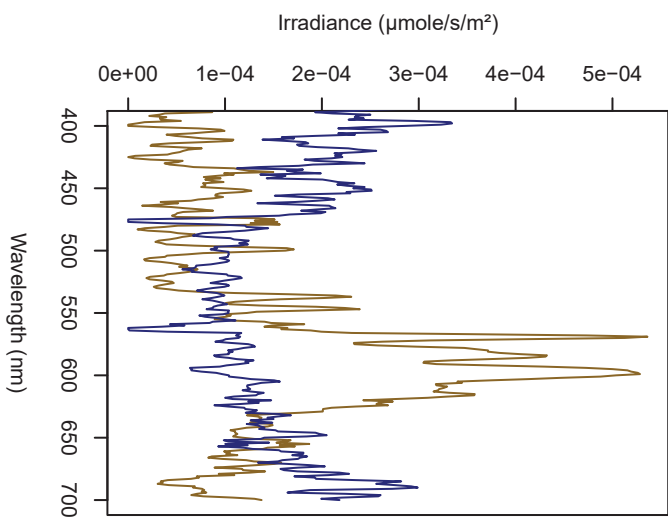

Site 34

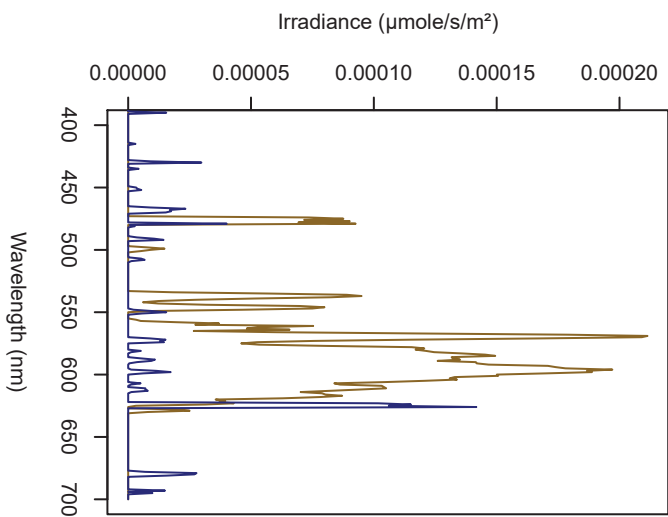

Supplement: pone.0186808.s004.pdf [file pone.0186808.s004.pdf]
